# Supplementary material
Source: Springer Nature journal article supplement (https://www.springermedizin.de/resource/supplementary/12937_2014_807_MOESM1_ESM.pdf/25654114)

# Total cancer

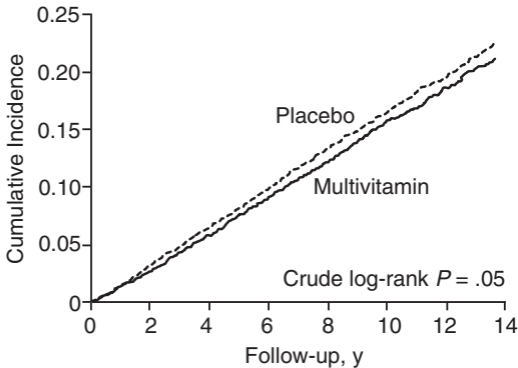

No. at risk

|              |      |      |      |      |      |      |      |
|--------------|------|------|------|------|------|------|------|
| Placebo      | 7324 | 7006 | 6645 | 6260 | 5858 | 5441 | 2439 |
| Multivitamin | 7317 | 7023 | 6689 | 6321 | 5929 | 5514 | 2482 |

Supplement: MOESM1 [file 25654114]
